# Supplementary material for: In vivo synthesis of semiconductor nanoparticles in Azotobacter vinelandii for light-driven ammonia production
Source: Royal Society of Chemistry journal article supplement (doi:10.1039/d4nr02177k), 2024-12-10
Supplement: d4nr02177k1.pdf [file d4nr02177k1.pdf]

## Supporting information

### ***In vivo* synthesis of semiconductor nanoparticles in *Azotobacter vinelandii* for light-driven ammonia production**

Gui-Min Kim,<sup>†a,b</sup> Yoojin Choi,<sup>†c</sup> Kyeong Rok Choi,<sup>a,d,e</sup> Ilsong Lee,<sup>a,b</sup> Jayeong Kim,<sup>a,b</sup> Byunghyun Lee,<sup>a,b</sup> Sang Yup Lee  
<sup>\*a,d,f</sup> and Doh C. Lee <sup>\*a,b</sup>

- a. Department of Chemical and Biomolecular Engineering, Korea Advanced Institute of Science and Technology (KAIST), 291 Daehak-ro, Yuseong-gu, Daejeon 34141, Republic of Korea.
  - b. KAIST Institute for the Nanocentury (KINC), Energy & Environmental Research Center (EERC), KAIST, Daejeon, Republic of Korea
  - c. Department of Chemistry, Research Institute of Chem-Bio Diagnostic Technology, Chung-Ang University, 84 Heukseok-ro, Dongjak-gu, Seoul 06974, Republic of Korea
  - d. Metabolic and Biomolecular Engineering National Research Laboratory, Systems Metabolic Engineering and Systems Healthcare Cross Generation Collaborative Laboratory, BioProcess Engineering Research Center, KAIST, Daejeon, Republic of Korea
  - e. R&D Center, GS Caltex Corporation, Yuseong-gu, Daejeon, Republic of Korea
  - f. BioInformatics Research Center, KAIST, Daejeon, Republic of Korea
- † These authors contributed equally to this work.

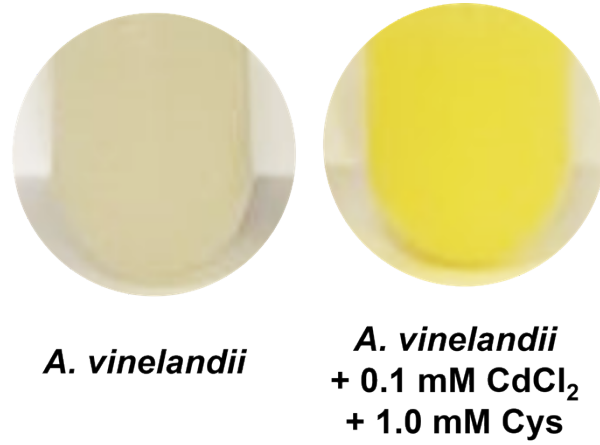

**Fig. S1** Photographs of *A. vinelandii* only (left) and *A. vinelandii* cultured in a medium containing 0.1 mM CdCl<sub>2</sub> and 1.0 mM cysteine (cys) (right). The images illustrate the coloration differences in response to the presence of the biosynthesis precursors

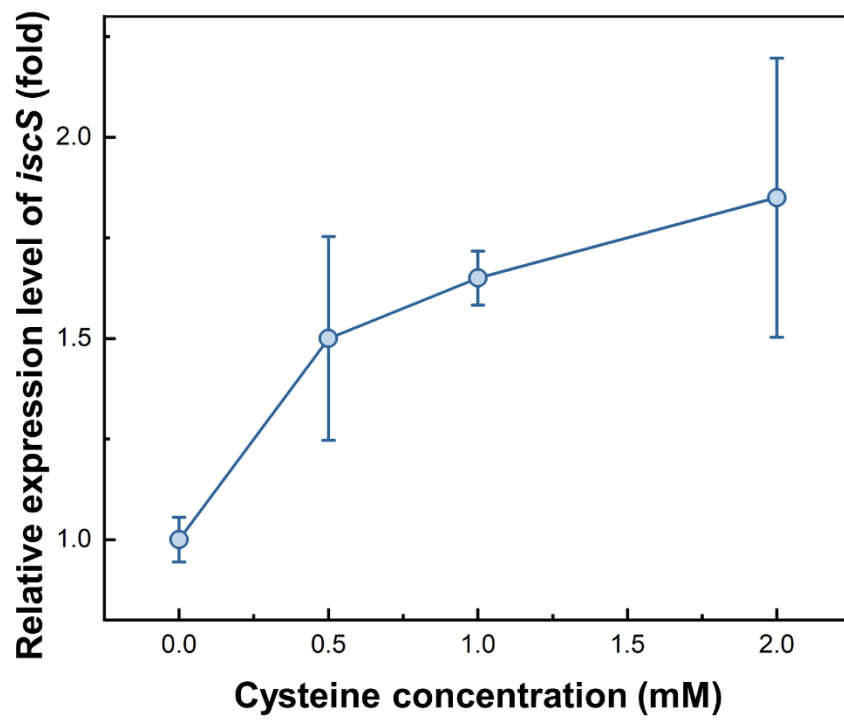

**Fig. S2** Relative expression level of *icsS* gene of *A. vinelandii* cell with varying cysteine concentrations of the culture condition.

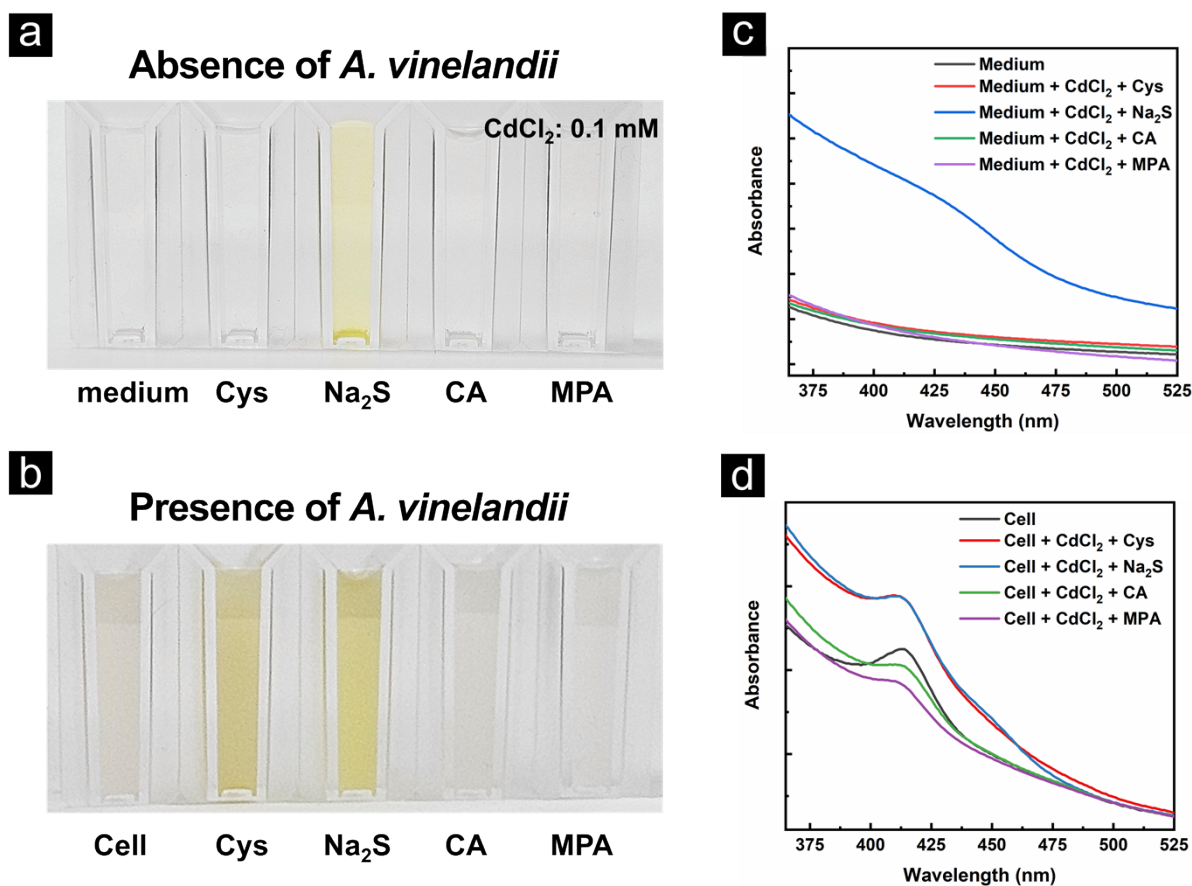

**Fig. S3** Photographs of the culture media containing 0.1 mM CdCl<sub>2</sub> and various sulfur precursors—cysteine (Cys), sodium sulfide (Na<sub>2</sub>S), cysteamine (CA), and 3-mercaptopropionic acid (MPA)—after the cultivation condition (24 h, 30 °C) in (a) the absence and (b) the presence of *A. vinelandii*. The characteristic yellow color represents the synthesized CdS nanoparticles. Absorption spectra of the corresponding culture media in (c) the absence and (d) the presence of *A. vinelandii*.

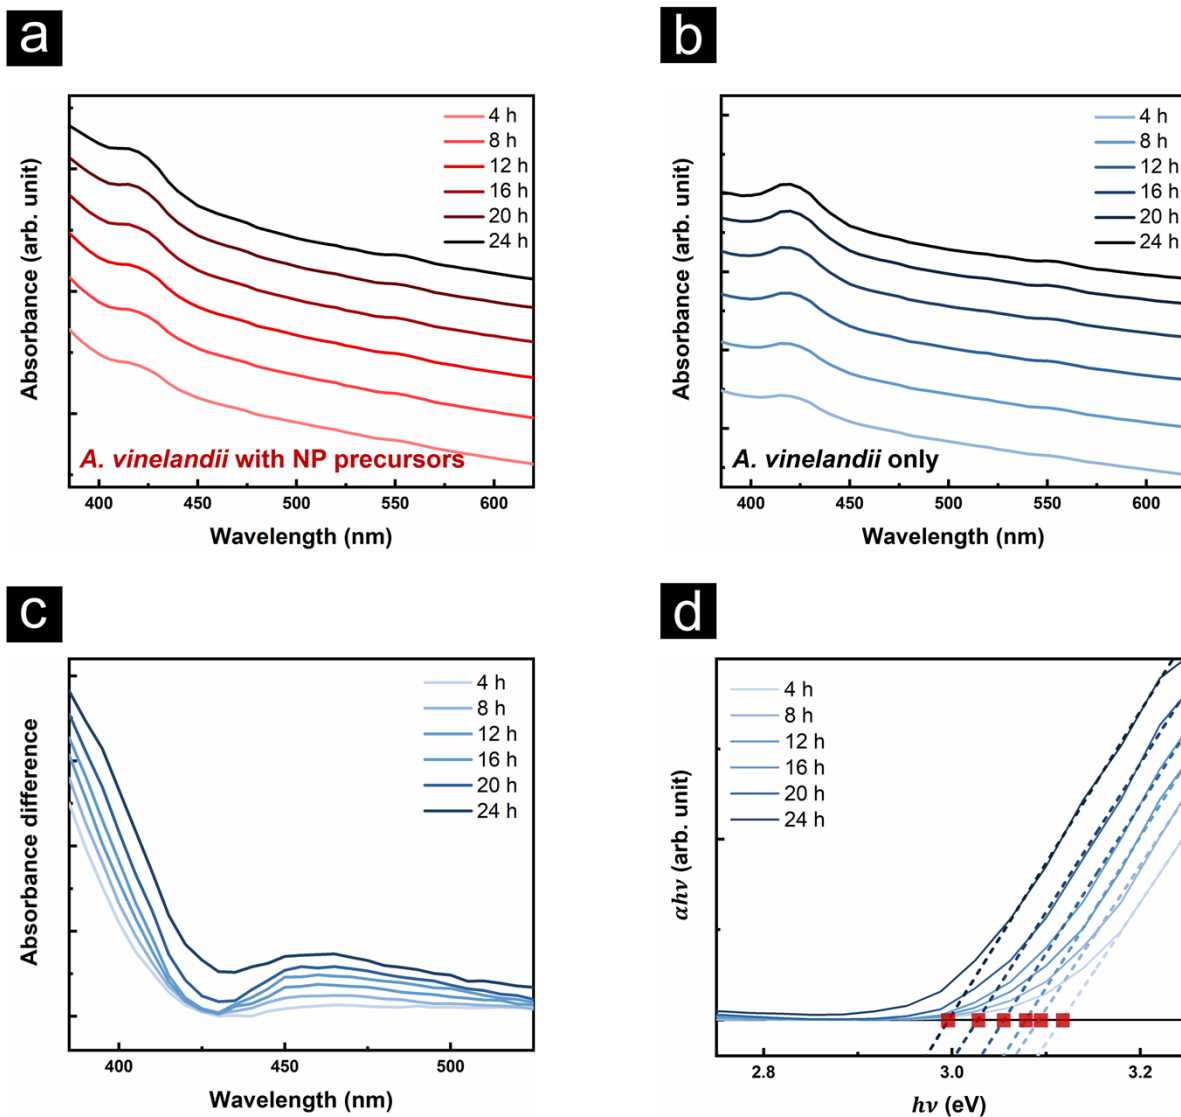

**Fig. S4** Absorbance of *A. vinelandii* cultured for 24 h at 30 °C in (a) a medium with NP biosynthesis precursors and (b) a medium without precursors. (c) Absorbance difference between of *A. vinelandii* when cultured in a medium with nanoparticle biosynthesis precursors versus a control medium. (d) Tauc plot for determining the band gap of CdS nanoparticles synthesized within the *A. vinelandii*. Red squares represent the x-intercepts of corresponding tangents (dashed line) for estimating band gaps of nanoparticles.

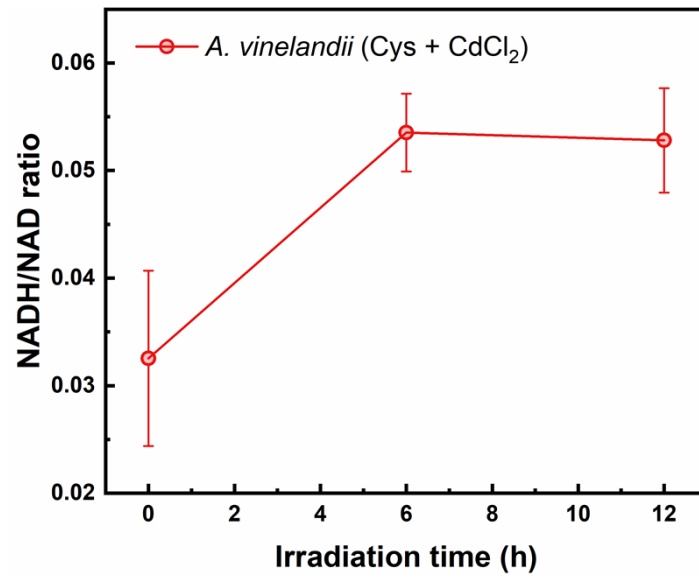

Fig. S5 NADH/NAD ratio of *A. vinelandii* (Cys + CdCl<sub>2</sub>) biohybrid under light irradiation.

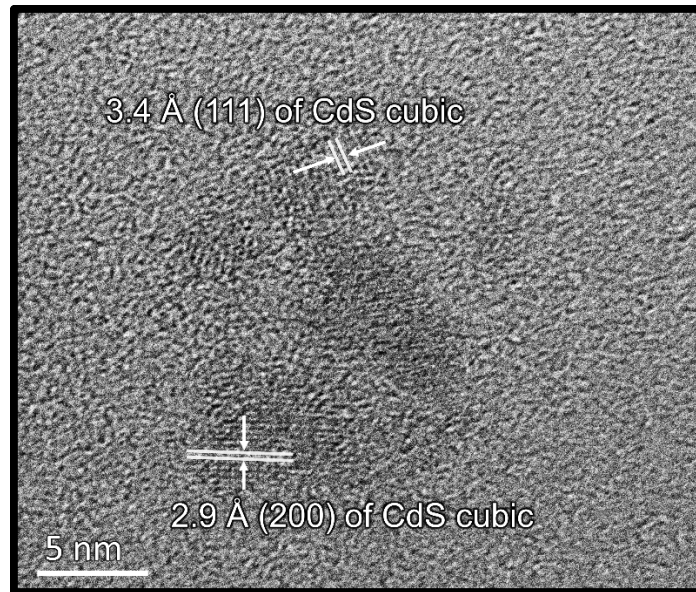

**Fig. S6** TEM image of CdS nanoparticle with the (111), (200) lattice fringe of CdS cubic structure.

**Table S1.** Comparative table of inorganic-bacteria biohybrid for light-driven ammonia production with N<sub>2</sub> fixation

| <b>Bacteria species</b>                | <b>Photosensitizer</b>                                                                | <b>Light source</b> | <b>Strategy</b>                                     | <b>Productivity (mol NH<sub>4</sub><sup>+</sup>/mol cells)</b> | <b>Ref.</b>      |
|----------------------------------------|---------------------------------------------------------------------------------------|---------------------|-----------------------------------------------------|----------------------------------------------------------------|------------------|
| <i>A. vinelandii</i> (DJ995)           | CdS/ZnS, CdSe/ZnS, InP/ZnS, Cu <sub>2</sub> ZnSn <sub>5</sub> S <sub>4</sub> /ZnS QDs | 400 nm LED          | Mixing cell and QDs                                 | 4 x 10 <sup>7</sup>                                            | 1                |
| <i>A. vinelandii</i> (DJ995)           | Au nanoclusters                                                                       | 400 nm LED          | Mixing cell and Au nanoclusters                     | 1 x 10 <sup>8</sup>                                            | 2                |
| <i>A. vinelandii</i> (KCTC2426)        | InP/ZnSe QDs                                                                          | 400 nm LED          | Cell co-culture with QD during growth phase         | 1.4 x 10 <sup>8</sup>                                          | 3                |
| <b><i>A. vinelandii</i> (KCTC2426)</b> | <b>CdS nanoparticles</b>                                                              | <b>400 nm LED</b>   | <b>Intracellular NP <i>in vivo</i> biosynthesis</b> | <b>1.8 x 10<sup>8</sup></b>                                    | <b>This work</b> |



## Reference

- 1 Y. Ding, J. R. Bertram, C. Eckert, R. R. Bommareddy, R. Patel, A. Conradie, S. Bryan and P. Nagpal, *J. Am. Chem. Soc.*, 2019, **141**, 10272–10282.
- 2 J. R. Bertram, Y. Ding and P. Nagpal, *Nanoscale Adv.*, 2020, **2**, 2363–2370.
- 3 S. Koh, Y. Choi, I. Lee, G.-M. Kim, J. Kim, Y.-S. Park, S. Y. Lee and D. C. Lee, *J. Am. Chem. Soc.*, 2022, **144**, 10798–10808.
